# Supplementary material
Source: Springer Nature journal article supplement (https://www.springermedizin.de/resource/supplementary/13049_2009_148_MOESM1_ESM.pdf/9666110)
Supplement: MOESM1 [file 9666110]

## Time sequences

## Events

0 minutes  
10 minutes  
25 minutes  
50 minutes \*  
150 minutes

0 minutes  
2 minutes  
5 minutes  
10 minutes \*  
20 minutes  
70 minutes \*  
75 minutes  
**90 minutes**

0 minutes  
5 minutes \*  
↓  
120 minutes \*  
150 minutes  
155 minutes  
170 minutes \*  
171 minutes \*  
**180 minutes**

### Witnessed loss of consciousness and subsequent seizure

Fully awake at arrival of ambulance  
Admittance in the hospital, primary assessment without abnormal findings  
Arrival in the neurological ward

### Cardiac arrest in the ward is witnessed, CPR is initiated

Arrival of the resuscitation team. Defibrillation of VF to SR  
Intubation (fentanyl and midazolam as sedative agents)  
Transport to ICU, sedation is discontinued  
Monitoring, arterial and central venous lines established  
Lack of normal awakening  
Initiation of therapeutic hypothermia

### First of subsequent 98 episodes of TdP degenerating to VF

Hypothermic infusion is discontinued  
Multiple efforts to stabilize rhythm including recommended anti-arrhythmic drugs  
Increasing frequency of TdP is noticed  
Bretylium 10 ml administered (95 defibrillations have been given)  
Start of a 20 min period with stable sinus rhythm, transport to cardiac laboratory  
Placing of temporary ventricular pacing lead is finished  
Overdrive pacing is initiated, another three events of TdP degenerating to VF are handled  
**Effective overdrive pacing is achieved and circulation is stable**

\* = Time point is estimated
